# Supplementary material
Source: Springer Nature journal article supplement (https://www.springerprofessional.de/resource/supplementary/13638_2013_738_MOESM5_ESM.pdf/11898298)

Packet Length = 1000 bytes, (MCS12, MCS13, MCS14, MCS15)

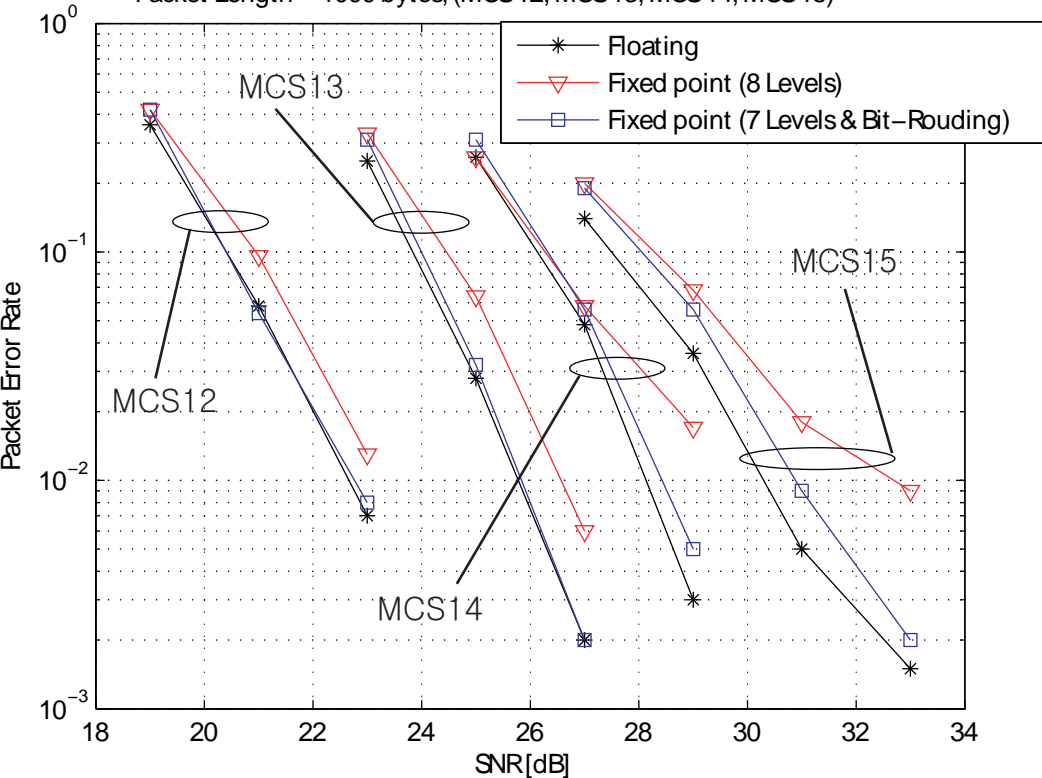

Supplement: MOESM5 [file 11898298]
